# Supplementary material
Source: publisher figshare collection journal article supplement (https://acs.figshare.com/ndownloader/files/9641731)
Supplement: Supplementary file 1 [file 9641731]

Compound	SMILE
CP-24879	CC(C)CCOC1=CC=C(N)C=C1
CP-74006	NC1=C(C(NC2=CC=CC(Cl)=C2)=O)C=CC=C1
Lexicon Indazole series	ClC1=CC(NC2=NNC3=C2C=C(OC)C=C3)=CC=C1
Takeda Fused pyrimidinone series	O=C1N(C2=CC=C(OCC(F)(F)F)C=C2)C(OCC(F)(F)C(F)(F)F)=NC3=C1CC(N3)=O
Takeda Monocyclic pyrimidinone series	O=C1N(C2=CC=C(OCC(F)(F)F)C=C2)C(OCC(F)(F)F)=NC(C3=CNN=C3)=C1
1	O=C(N1C)N(CC2=C(Cl)C=C(Cl)C(O)=C2)C3=C1C=CC=C3
2	O=C(C(C)N(C(C1=CC=C(Cl)C=C1)=O)CC2)N2C3=CC(OC)=CC=C3OC
3	O=C(C1=CC(OCO2)=C2C=C1)N(C)CC3=CC=C(OC)C=C3OC
4	FC(C=C1)=CC=C1C(C)N(C(C2=CN(CC)C3=C2C=CC=C3)=O)C
5a	O=C1N(CC2=C(Cl)C=C(Cl)C(O)=C2)CC(O1)C3=CC=CC=C3
5b	FC(C=C1)=CC=C1C2CN(CC3=C(Cl)C=C(Cl)C=C3)C(O2)=O
5c	O=C1OC(C2=CC=C(F)C=C2)CN1C3=CC=CC=C3
5d	O=C1OC(C2=CC=C(F)C=C2)CN1C3=CC(F)=CC=C3
5e	O=C1OC(C2=CC=C(F)C=C2)CN1C3=CC(Cl)=CC=C3
5f	O=C1OC(C2=CC=C(F)C=C2)CN1C3=CC(C#N)=CC=C3
(S)-5f	O=C1O[C@@H](C2=CC=C(F)C=C2)CN1C3=CC(C#N)=CC=C3
(R)-5f	O=C1O[C@H](C2=CC=C(F)C=C2)CN1C3=CC(C#N)=CC=C3
5g	O=C1OC(C2=CC=C(F)C=C2)CN1C3=CC(OC)=CC=C3OC
5h	O=C1OC(C2=CC=C(F)C=C2)CN1C3=CC(OC)=CC=C3
5i	O=C1O[C@@H](C2=CC=C(F)C=C2)[C@H](C)N1C3=CC(C#N)=CC=C3
(4S,5S)-5i	O=C1O[C@@H](C2=CC=C(F)C=C2)[C@H](C)N1C3=CC(C#N)=CC=C3
(4R,5R)-5i	O=C1O[C@H](C2=CC=C(F)C=C2)[C@@H](C)N1C3=CC(C#N)=CC=C3
5j	O=C1O[C@@H](C2=CC=C(F)C=C2)[C@@H](C)N1C3=CC(C#N)=CC=C3
5k	O=C1OC(C2=CC=C(F)C=C2)C(C)(C)N1C3=CC(C#N)=CC=C3
5l	O=C1O[C@@H](C2=CC=C(F)C=C2)[C@H](C)N1C3=CC(C#N)=CC(F)=C3
5m	O=C1O[C@@H](C2=CC=C(F)C=C2)[C@H](C)N1C3=CC(C#N)=CC(Cl)=C3
(4S,5S)-5m	O=C1O[C@@H](C2=CC=C(F)C=C2)[C@H](C)N1C3=CC(C#N)=CC(Cl)=C3
5n	O=C1O[C@@H](C2=CC=C(F)C=C2)[C@H](C)N1C3=CC(C#N)=CC(C#N)=C3
(4S,5S)-5n	O=C1O[C@@H](C2=CC=C(F)C=C2)[C@H](C)N1C3=CC(C#N)=CC(C#N)=C3
6	NCC(O)C1=CC=CC=C1
7	O=C1NCC(O1)C2=CC=CC=C2
8	OC1=C(Cl)C=C(Cl)C(CO)=C1
9	OC(CNC(OC(C)(C)C)=O)=O
10	O=C(N(C)OC)CNC(OC(C)(C)C)=O
11	O=C(C1=CC=C(F)C=C1)CNC(OC(C)(C)C)=O
12	OC(C1=CC=C(F)C=C1)CNC(OC(C)(C)C)=O
13	FC(C=C1)=CC=C1C2CNC(O2)=O
14	FC1=CC=C(C2CO2)C=C1
15a	OC(CNC1=CC(OC)=CC=C1OC)C2=CC=C(F)C=C2
15b	OC(CNC1=CC(OC)=CC=C1)C2=CC=C(F)C=C2
16	OC(C(C)NC(OC(C)(C)C)=O)=O
17	O=C(N(C)OC)C(C)NC(OC(C)(C)C)=O
18	O=C(C1=CC=C(F)C=C1)C(C)NC(OC(C)(C)C)=O
19	OC(C1=CC=C(F)C=C1)C(C)N
20	OC(C1=CC=C(F)C=C1)C(C)NC2=CC(Br)=CC=C2
21	O=C1O[C@@H](C2=CC=C(F)C=C2)[C@H](C)N1C3=CC(Br)=CC=C3
22	O=C1O[C@@H](C2=CC=C(F)C=C2)[C@@H](C)N1C3=CC(Br)=CC=C3
23	OC(C(C)(C)NC(OC(C)(C)C)=O)=O
24	O=C(N(C)OC)C(C)(C)NC(OC(C)(C)C)=O
25	O=C(C1=CC=C(F)C=C1)C(C)(C)NC(OC(C)(C)C)=O
26	OC(C1=CC=C(F)C=C1)C(C)(C)N.Cl
27	OC(C1=CC=C(F)C=C1)C(C)(C)NC2=CC(Br)=CC=C2
28	O=C1OC(C2=CC=C(F)C=C2)C(C)(C)N1C3=CC(Br)=CC=C3
29a	OC(C1=CC=C(F)C=C1)C(C)NC2=CC(Br)=CC(F)=C2
29b	OC(C1=CC=C(F)C=C1)C(C)NC2=CC(Br)=CC(Cl)=C2
30a	O=C1OC(C2=CC=C(F)C=C2)C(C)N1C3=CC(Br)=CC(F)=C3
30b	O=C1OC(C2=CC=C(F)C=C2)C(C)N1C3=CC(Br)=CC(Cl)=C3
31	FC1=CC=C(C(CC)=O)C=C1
32	FC1=CC=C(C(C(Br)C)=O)C=C1
33	FC1=CC=C(C(C(C)N(CC2=CC=CC=C2)CC3=CC=CC=C3)=O)C=C1
34	FC1=CC=C([C@H](O)[C@H](C)N(CC2=CC=CC=C2)CC3=CC=CC=C3)C=C1
35	FC1=CC=C([C@H](O)[C@H](C)N)C=C1
36	FC1=CC=C([C@H](O)[C@H](C)NC(OC(C)(C)C)=O)C=C1
37	FC(C=C1)=CC=C1[C@@H]([C@H](C)N)O
37-HCl	FC1=CC=C([C@@H]([C@H](C)N)O)C=C1.Cl
38	O[C@H]([C@H](C)NC1=CC(Br)=CC(Br)=C1)C2=CC=C(F)C=C2
39	O=C1N(C2=CC(Br)=CC(Br)=C2)[C@@H](C)[C@H](C3=CC=C(F)C=C3)O1
40	O=C(OC(C)(C)C)N[C@H](C(O)=O)C
41	O=C(N(C)OC)[C@@H](NC(OC(C)(C)C)=O)C
42	O=C(C1=CC=C(F)C=C1)[C@@H](NC(OC(C)(C)C)=O)C
43	O[C@H](C1=CC=C(F)C=C1)[C@@H](NC(OC(C)(C)C)=O)C
44	FC(C=C1)=CC=C1[C@H]2[C@H](C)NC(O2)=O
